# Supplementary material
Source: PubMed Central journal article supplement (PMC2830618)
Supplement: NIHMS167329-supplement-1_si_001.pdf [file NIHMS167329-supplement-1_si_001.pdf]

# Supporting Information:

## Reductive Coupling of Nitrogen Monoxide ( $\bullet\text{NO}$ ) Facilitated by Heme/Copper Complexes

Jun Wang,<sup>†</sup> Mark P. Schopfer,<sup>†</sup> Simona C. Puiu,<sup>†</sup> Amy A. N. Sarjeant<sup>†</sup> and Kenneth D. Karlin<sup>†‡\*</sup>

<sup>†</sup> Department of Chemistry, The Johns Hopkins University, Baltimore, Maryland 21218

<sup>‡</sup> Department of Bioinspired Science, Ewha Womans University, Seoul 120-750, Korea

\* Correspondence: karlin@jhu.edu

### Contents:

**Figure S1.** EPR spectrum (77 K) of  $[(\text{tmpa})\text{Cu}^{\text{II}}(\text{CH}_3\text{CN})](\text{ClO}_4)_2$  in acetone.

**Figure S2.** UV-Vis spectrum of  $(\text{tmpa})\text{Cu}^{\text{II}}(\text{NO}_2)\text{PF}_6$  in various solvents at RT.

**Figure S3.** EPR spectrum (77 K) of  $(\text{tmpa})\text{Cu}^{\text{II}}(\text{NO}_2)\text{PF}_6$  in  $\text{CH}_2\text{Cl}_2$ .

**Figure S4.** UV-Vis spectrum of  $(\text{F}_8)\text{Fe}(\text{NO})_2$  titration with  $(\text{F}_8)\text{Fe}^{\text{II}}$  in THF.

**Figure S5.** Variable-temperature  $^1\text{H}$ -NMR spectra of  $(\text{F}_8)\text{Fe}(\text{NO})$  in  $\text{CD}_2\text{Cl}_2$ .

**Figure S6.** Variable-temperature  $^2\text{H}$ -NMR Spectra of  $(\text{F}_8\text{-}d_8)\text{Fe}(\text{NO})$  in  $\text{CH}_2\text{Cl}_2$ .

**Figure S7.**  $^1\text{H}$ -NMR spectrum of  $(\text{F}_8)\text{Fe}(\text{NO})_2$  at  $-80\text{ }^\circ\text{C}$  in  $\text{CD}_2\text{Cl}_2$  and acetone-  $d_8$ , as well as spectra of the complex(es) observed upon warming.

**Figure S8.** Expanded EPR spectrum of the product mixture from the reaction of  $(\text{F}_8)\text{Fe}(\text{NO})_2 + [(\text{tmpa})\text{Cu}^{\text{I}}(\text{MeCN})]^+$ , i.e.  $(\text{F}_8)\text{FeNO}$ ,  $1/3 [(\text{tmpa})\text{Cu}^{\text{II}}(\text{NO}_2)]^+$  and unreacted  $2/3 [(\text{tmpa})\text{Cu}^{\text{I}}(\text{solvent})]^+$ .

**Figure S9.** UV-Vis spectra of  $(\text{F}_8)\text{Fe}^{\text{III}}\text{SbF}_6$  and  $(\text{F}_8)\text{Fe}^{\text{III}}\text{Cl}$  in  $\text{CH}_2\text{Cl}_2$ .

**Figure S10.** Variable-temperature  $^1\text{H}$ -NMR spectra of  $(\text{F}_8)\text{Fe}^{\text{III}}\text{SbF}_6$  in  $\text{CD}_2\text{Cl}_2$ .

**Figure S11.** Gas chromatography of the head space of the product mixture from the reaction of  $(\text{F}_8)\text{Fe}(\text{NO})_2 + [(\text{tmpa})\text{Cu}^{\text{I}}(\text{MeCN})]^+$  in the presence of acid.

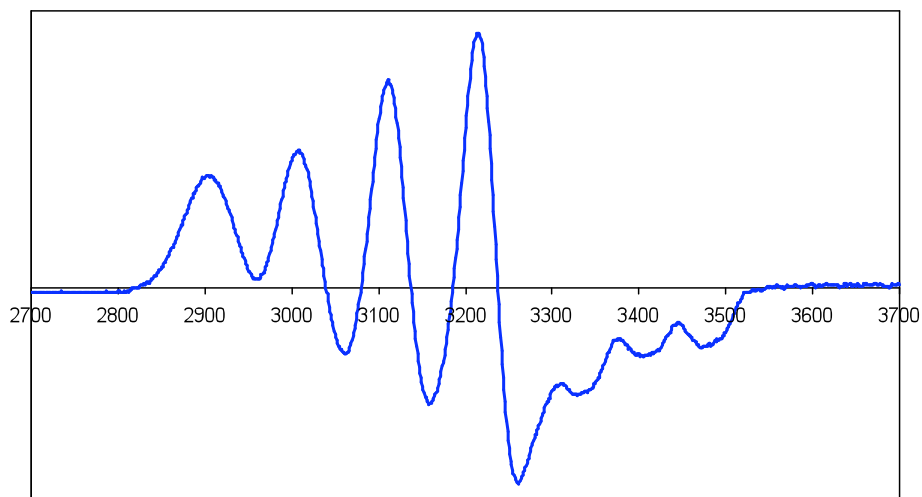

**Figure S1.** EPR spectrum (77K) of  $[(\text{tmpa})\text{Cu}^{\text{II}}(\text{CH}_3\text{CN})](\text{ClO}_4)_2$  in acetone ( $g_{\perp} = 2.22$ ,  $g_{\parallel} = 2.02$ ,  $A_{\perp} = 105$  G,  $A_{\parallel} = 71$  G).

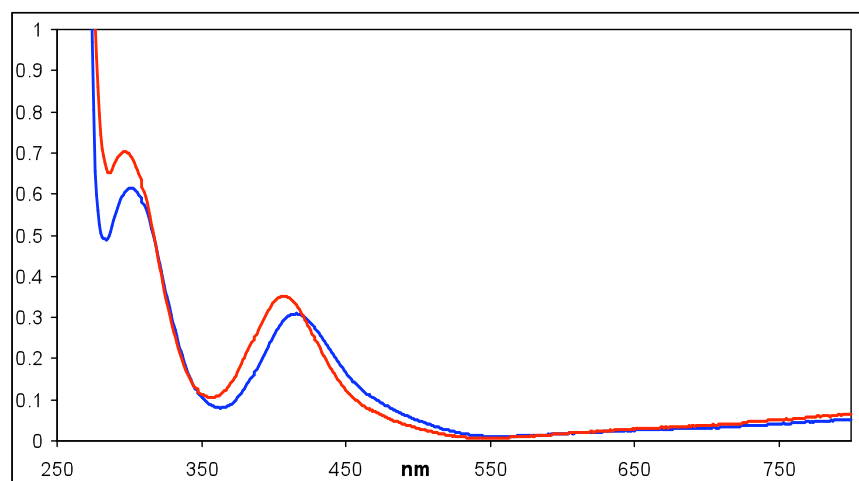

**Figure S2.** UV-Vis spectrum (RT) of  $[(\text{tmpa})\text{Cu}(\text{NO}_2)]\text{PF}_6$  in  $\text{CH}_2\text{Cl}_2$  (blue,  $\lambda_{\text{max}} = 301, 415$  nm) and in  $\text{CH}_3\text{CN}$  (red,  $\lambda_{\text{max}} = 297, 406$  nm).

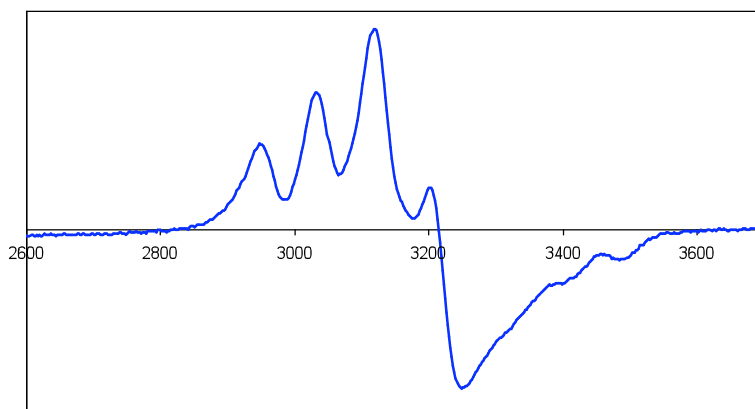

**Figure S3.** EPR spectrum (77 K) of  $[(\text{tmpa})\text{Cu}(\text{NO}_2)]\text{PF}_6$  in  $\text{CH}_2\text{Cl}_2$  ( $g_{\perp} = 2.21$ ,  $g_{\parallel} = 2.01$ ,  $A_{\perp} = 84$  G,  $A_{\parallel} = 80$  G).

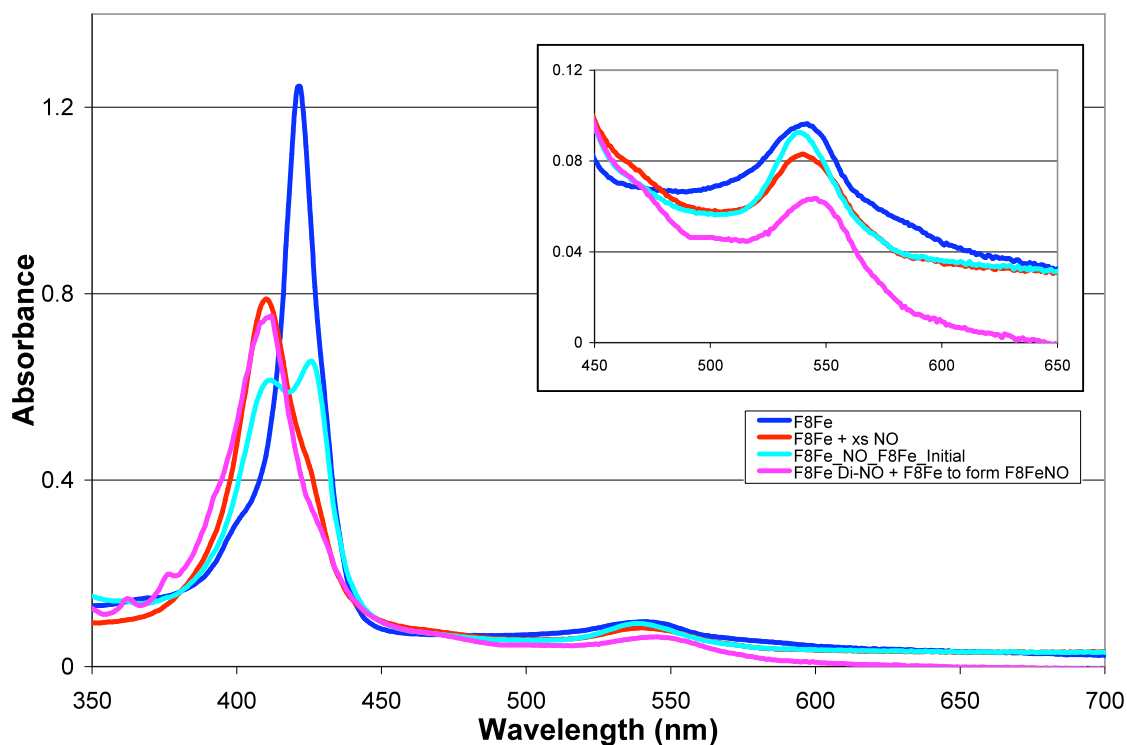

**Figure S4.** UV-Vis spectrum (in THF) of  $(\text{F}_8)\text{Fe}(\text{NO})_2$  titration with  $(\text{F}_8)\text{Fe}^{\text{II}}$  in THF.  $(\text{F}_8)\text{Fe}^{\text{II}}$  (**blue**,  $\lambda_{\text{max}} = 422$  nm (Soret), 542 nm) at  $-78$  °C;  $(\text{F}_8)\text{Fe}(\text{NO})_2$  (**red**,  $\lambda_{\text{max}} = 410$  (Soret), 540 nm) was formed after bubbling excess  $\bullet\text{NO}_{(\text{g})}$  through the solution and vacuum/purge cycles to remove excess  $\bullet\text{NO}_{(\text{g})}$  at  $-78$  °C; the mixture (**light blue**,  $\lambda_{\text{max}} = 410, 422, 540$  nm) after an equal volume solution of  $(\text{F}_8)\text{Fe}^{\text{II}}$  was added at  $-78$  °C; the product (**purple**,  $\lambda_{\text{max}} = 410$  (Soret), 546 nm) after warming to RT and re-cooling to  $-78$  °C.

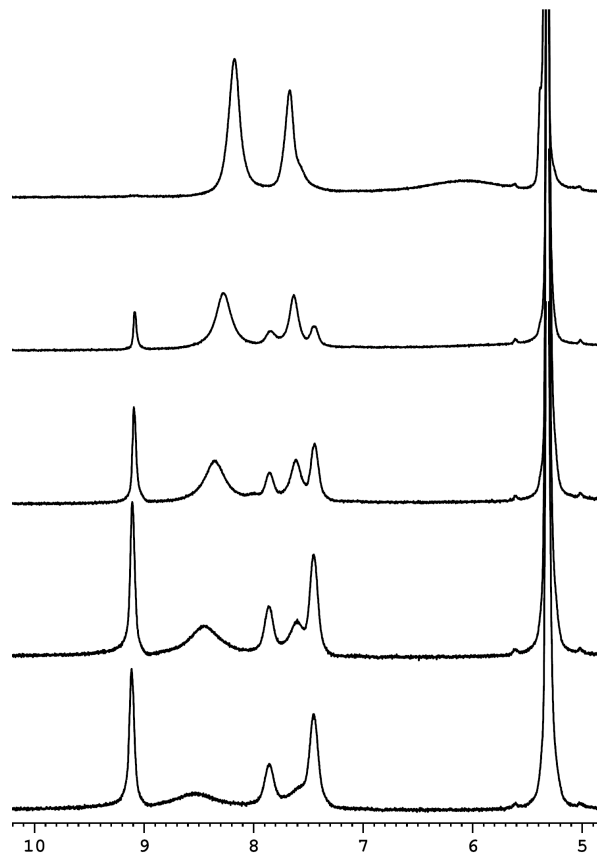

**Figure S5.** Variable-temperature <sup>1</sup>H-NMR spectra of (F<sub>8</sub>)Fe(NO) in CD<sub>2</sub>Cl<sub>2</sub>. From top to bottom, the temperatures at which the spectrum was recorded are 20 °C, -20 °C, -40 °C, -60 °C and -80 °C.

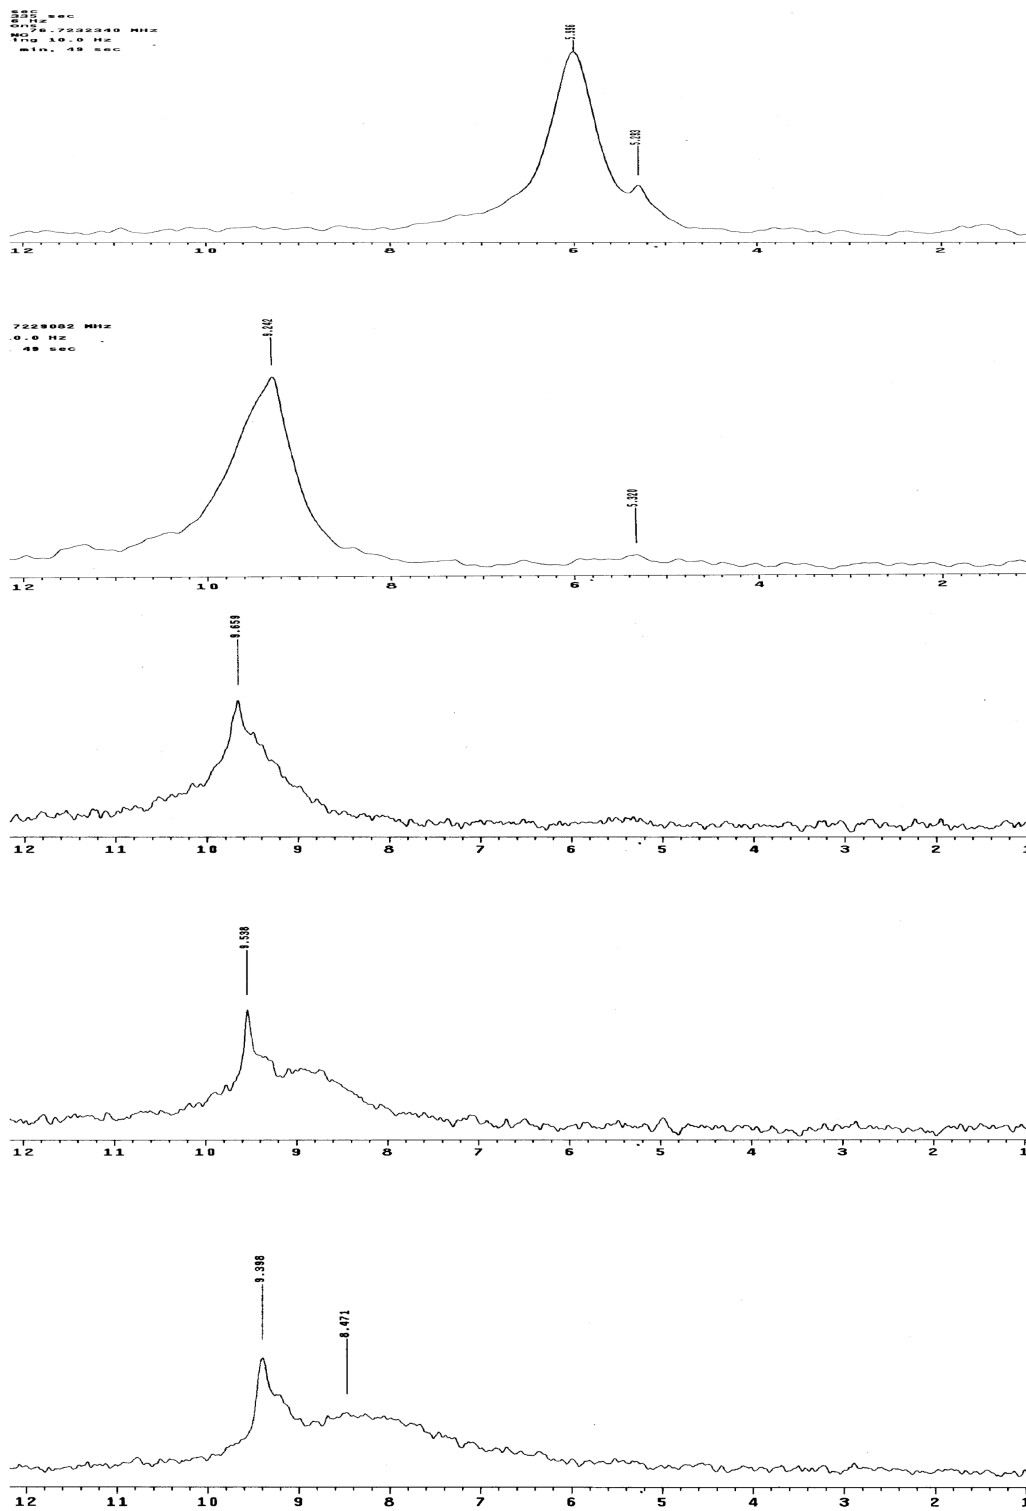

**Figure S6.** Variable-temperature  $^2\text{H}$ -NMR spectra of  $(\text{F}_8\text{-}d_8)\text{Fe}(\text{NO})$  in  $\text{CH}_2\text{Cl}_2$ . The temperatures at which the spectrum was recorded are 20 °C, -20 °C, -40 °C, -60 °C and -80 °C, from top to bottom.

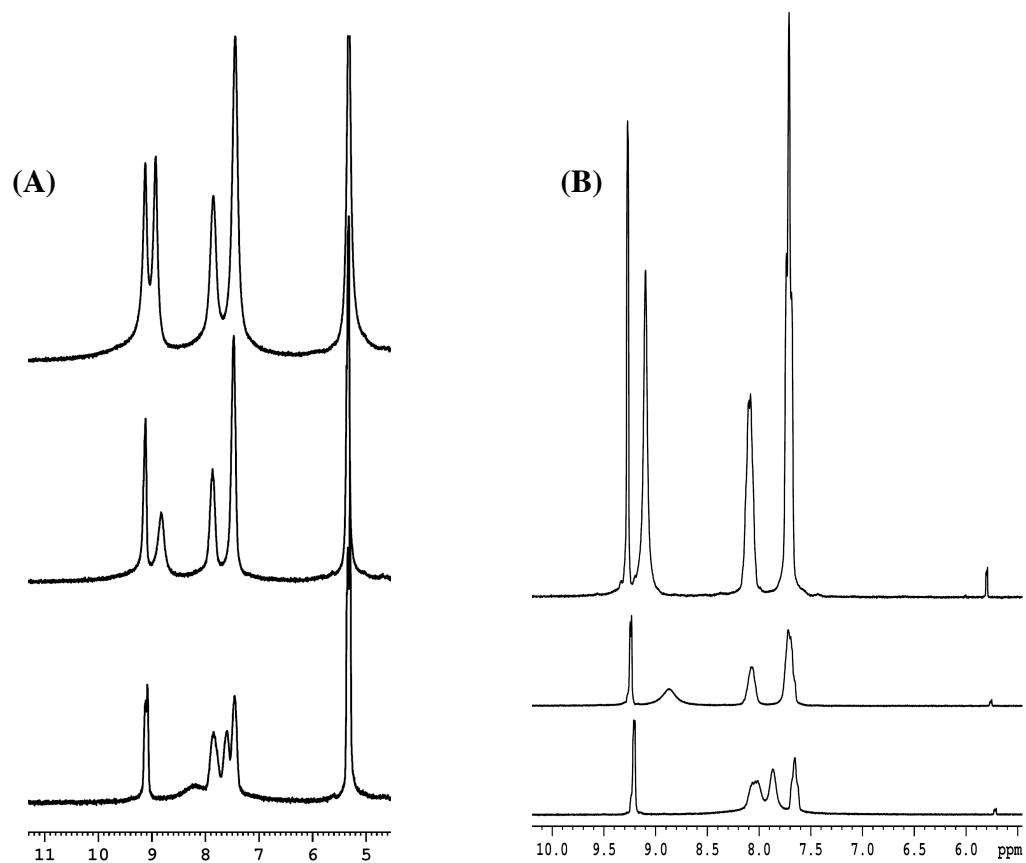

**Figure S7.**  $^1\text{H-NMR}$  spectra of  $(\text{F}_8)\text{Fe}(\text{NO})_2$ . (A) in  $\text{CD}_2\text{Cl}_2$ , **Top**: at  $-80\text{ }^\circ\text{C}$ ; **Middle**: after warming to  $-60\text{ }^\circ\text{C}$ ; **Bottom**: after warming to  $-40\text{ }^\circ\text{C}$ . (B) in  $\text{acetone-}d_8$ , **Top**: at  $-80\text{ }^\circ\text{C}$ ; **Middle**: after warming to  $-60\text{ }^\circ\text{C}$ ; **Bottom**: after warming to  $-40\text{ }^\circ\text{C}$ .

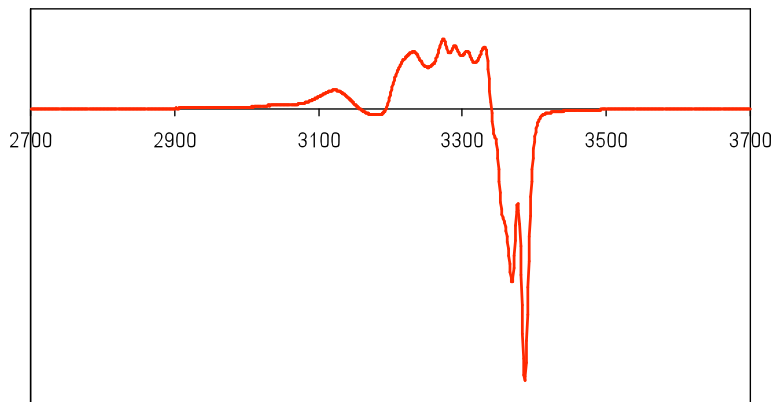

**Figure S8.** Expanded view of the EPR spectrum of the product mixture from the reaction of  $(F_8)Fe(NO)_2 + [(tmpa)Cu^I(MeCN)]^+$ , i.e. complexes  $(F_8)FeNO$ ,  $1/3 [(tmpa)Cu^{II}(NO_2)]^+$  and unreacted  $2/3 [(tmpa)Cu^I(solvent)]^+$ .

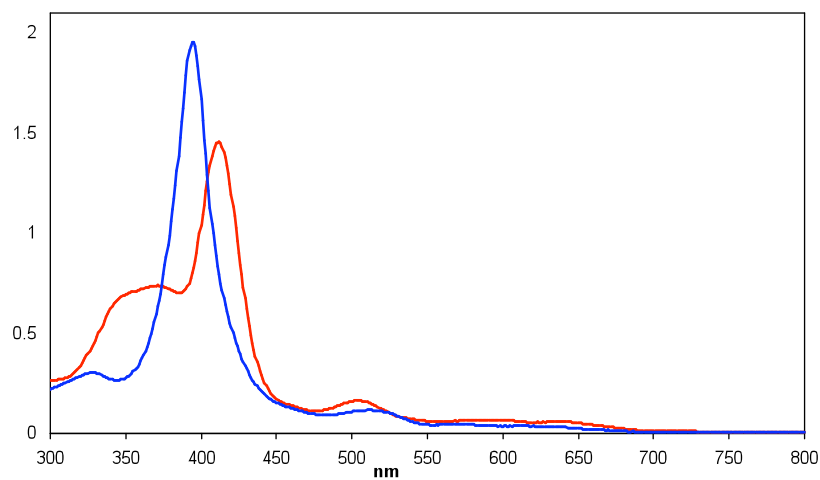

**Figure S9.** UV-Vis Spectrum (RT) of  $[(F_8)Fe^{III}]SbF_6$  (**blue**,  $\lambda_{max} = 394$  (Soret), 512 nm) and  $(F_8)Fe^{III}Cl$  (**red**,  $\lambda_{max} = 370, 411$  (Soret), 503, 639 nm) in  $CH_2Cl_2$ .

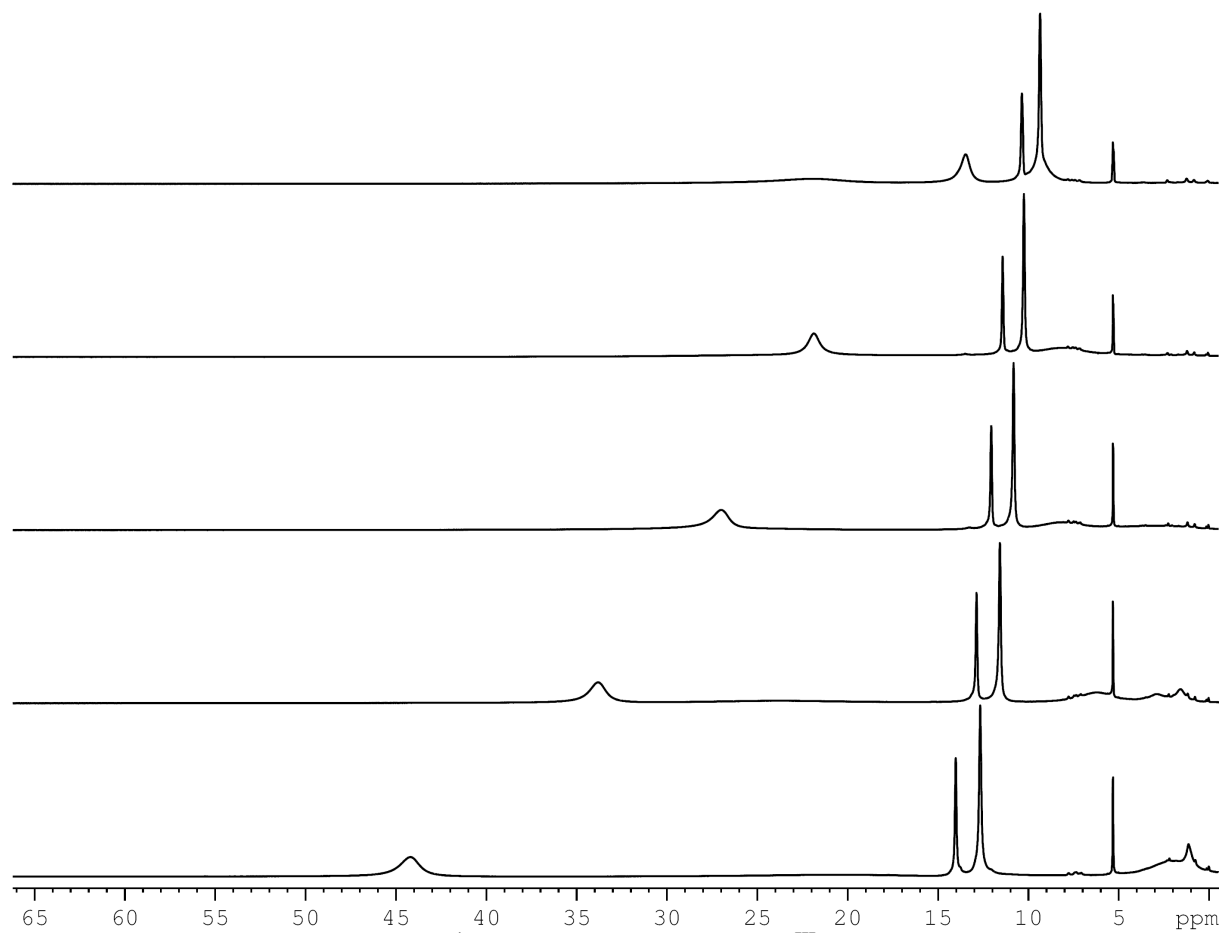

**Figure S10.** Variable-temperature  $^1\text{H-NMR}$  spectra of  $(\text{F}_8)\text{Fe}^{\text{III}}\text{SbF}_6$  in  $\text{CD}_2\text{Cl}_2$ . From top to bottom, the temperatures at which the spectrum was recorded are 20 °C, -20 °C, -40 °C, -60 °C and -80 °C.



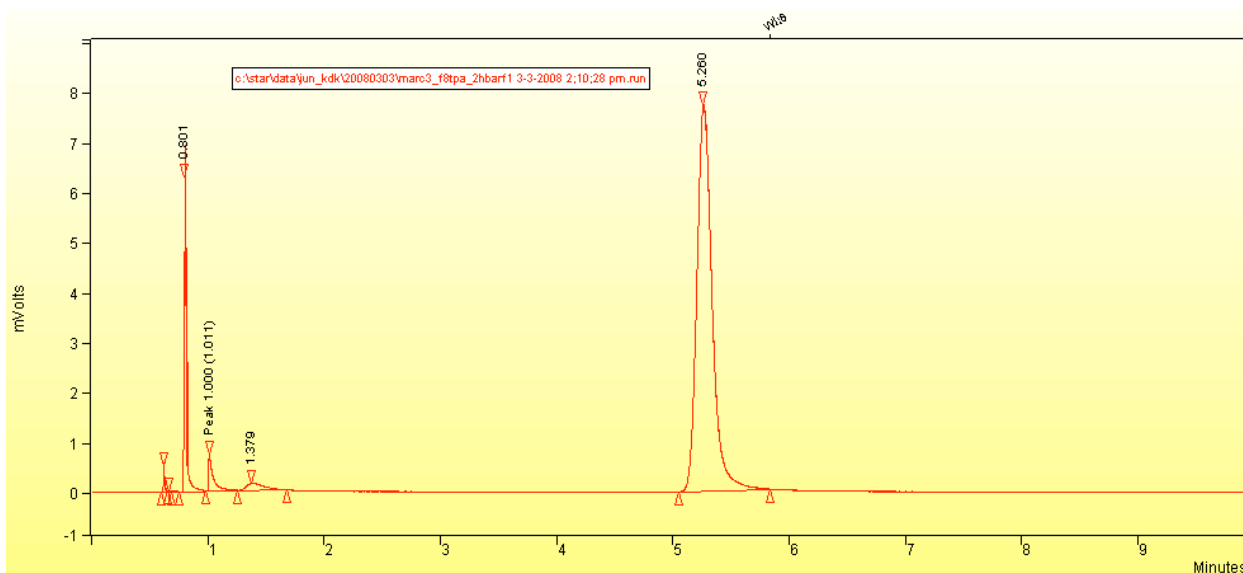

**Figure S11.** Gas chromatography (GC) of the head space of the product mixture, obtained from the reaction of  $(F_8)Fe(NO)_2$  with  $[(tmpa)Cu^I(MeCN)]^+$  plus Acid. It was performed on a Varian CP-3800 instrument equipped with a 1041 manual injector, electron conductivity detector, and a 25 m 5 Å molecular sieve capillary column. When the oven temperature is 200 °C and the flow rate equals to 8 mL/min, the retention time (min) are 5.260 for  $N_2O$ , 0.801 for small amount of air in the syringe needle that was used for gas injection, 1.000 and 1.379 for trace impurities.
